# Supplementary material for: In Vivo Generation of Engraftable Murine Hematopoietic Stem Cells by Gfi1b, c-Fos, and Gata2 Overexpression within Teratoma
Source: PubMed Central journal article supplement — Stem Cell Reports. 2017 Sep 21;9(4):1024–33. doi: 10.1016/j.stemcr.2017.08.010 (PMC5639260; doi:10.1016/j.stemcr.2017.08.010), 2017-09-21
Supplement: mmc1.pdf [file mmc1.pdf]

**Stem Cell Reports, Volume 9**

**Supplemental Information**

***In Vivo* Generation of Engraftable Murine Hematopoietic Stem Cells by  
*Gfi1b*, *c-Fos*, and *Gata2* Overexpression within Teratoma**

**Masao Tsukada, Yasunori Ota, Adam C. Wilkinson, Hans J. Becker, Motomi Osato, Hiromitsu Nakauchi, and Satoshi Yamazaki**

## Supplementary Information

### Supplementary Tables

**Supplementary Table 1: qPCR primer and probe list**

| Gene   | Forward (5' to 3')    | Reverse (3' to 5')        | Roche universal probe no. |
|--------|-----------------------|---------------------------|---------------------------|
| Gfi1b  | gcacagagtctcccttgac   | atgaggggtggagaacacc       | 80                        |
| cFos   | gggacagccttctactaccc  | agatctgcgcaaaagtctg       | 67                        |
| Gata2  | gcttcaccctaagcagaga   | atctcgtcgccagagagg        | 76                        |
| Erg    | catgagtctccggaaagcag  | tgaagcacaacacctctataaactt | 53                        |
| HoxA9  | tccctgactgactatgcttgg | gttggcagccgggttatt        | 25                        |
| Rora   | cctactgttcttcaccaacg  | tgttctgggcaagggttc        | 60                        |
| FoxC1  | gcttctctgctcattcgtctt | aaatatcttacaggtgagaggcaag | 34                        |
| Oct3/4 | aatgccgtgaagtggagaa   | ccttctgcaggggttcat        | 95                        |
| Sox2   | acagctacgcgcacatga    | ggtagcccagctgctct         | 19                        |
| Klf4   | cgggaaaggagaagacact   | gagttctcacgccaacg         | 62                        |

**Supplementary Table 2: Antibody staining list**

| Peripheral blood antibody staining        | Bone marrow antibody staining                                 |
|-------------------------------------------|---------------------------------------------------------------|
| CD45.1-PE-Cy7 (#560578 BD Biosciences)    | Biotinylated lineage cocktail (#130-092-613 (Miltenyibiotec)) |
| CD45.2-FITC (#109806 BioLegend)           | CD45.1-PB (#553776 BD Biosciences)                            |
| CD4-APC (#100515 BioLegend)               | CD45.2-FITC (#109805 BioLegend)                               |
| CD8-APC (#17-0088-42 eBioscience),        | Sca1-PE-Cy7 (#558162 PharMingen)                              |
| B220-APC-Cy7 (#25-0452-82 eBioscience)    | cKit-APC (#553356 PharMingen)                                 |
| Gr1-Pacific Blue (PB) (#108430 BioLegend) | Streptavidin-APC-Cy7 (#554063 PharMingen)                     |
| Mac-1-PB (#101224 BioLegend)              |                                                               |

## Supplementary Figures

### Supplementary Figure and Legends:

Figure S1

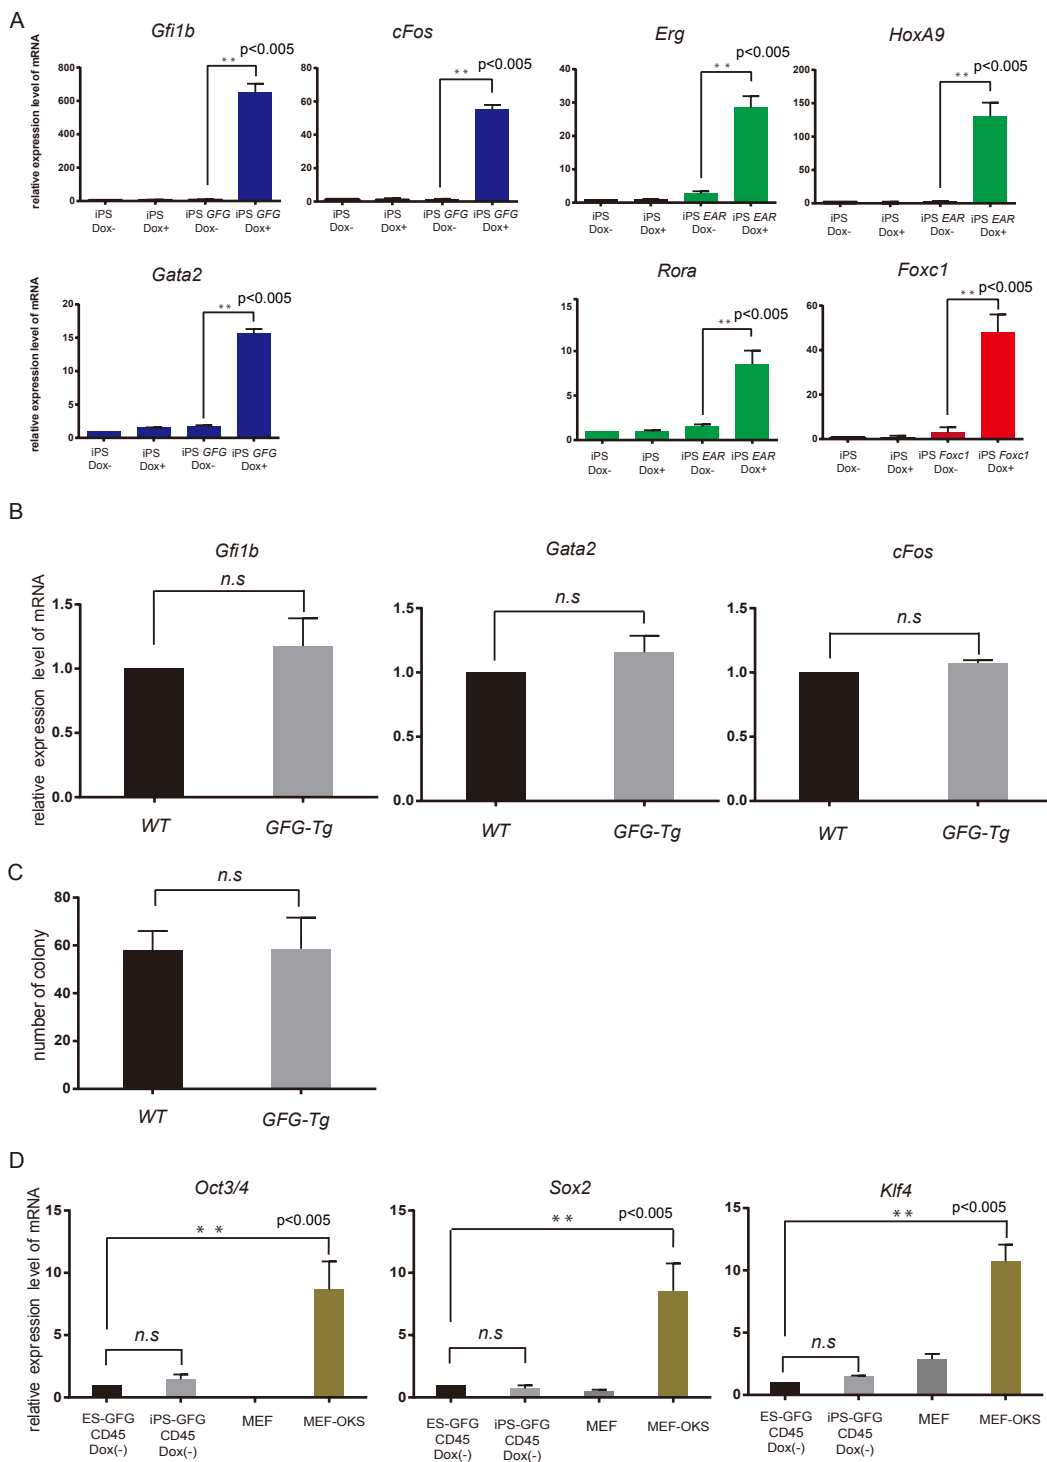

**Figure S1: Related to Figure 1; establishment of inducible iPSCs from Ly5.1 mice**

(A) Average relative transgene expression in iPSCs following a four-day induction by addition of Dox. Data are the mean  $\pm$  SD from two independent experiments (n = 3). \* $P < 0.005$ .

(B) Expression analysis of *Gfi1b*, *Gata2* and *cFos* in WBMCs of GFG transgenic mice (GFG-Tg) without Dox. Data are the mean  $\pm$  SD from two independent experiments (n = 3). n.s : not significant.

(C) Colony formation from WBMCs isolated from wild type mice and GFG-Tg mice without Dox. Data are the mean  $\pm$  SD from two independent experiments (n = 3). n.s : not significant.

(D) Analysis of reactivation of *Oct*, *Sox2* and *Klf4* genes using pluripotent stem cells derived CD45<sup>+</sup> cells by in vitro embryoid body differentiation and MEF. MEF-OKS group is positive control. Data are the mean  $\pm$  SD from two independent experiments (n = 5). n.s : not significant.

Figure S2

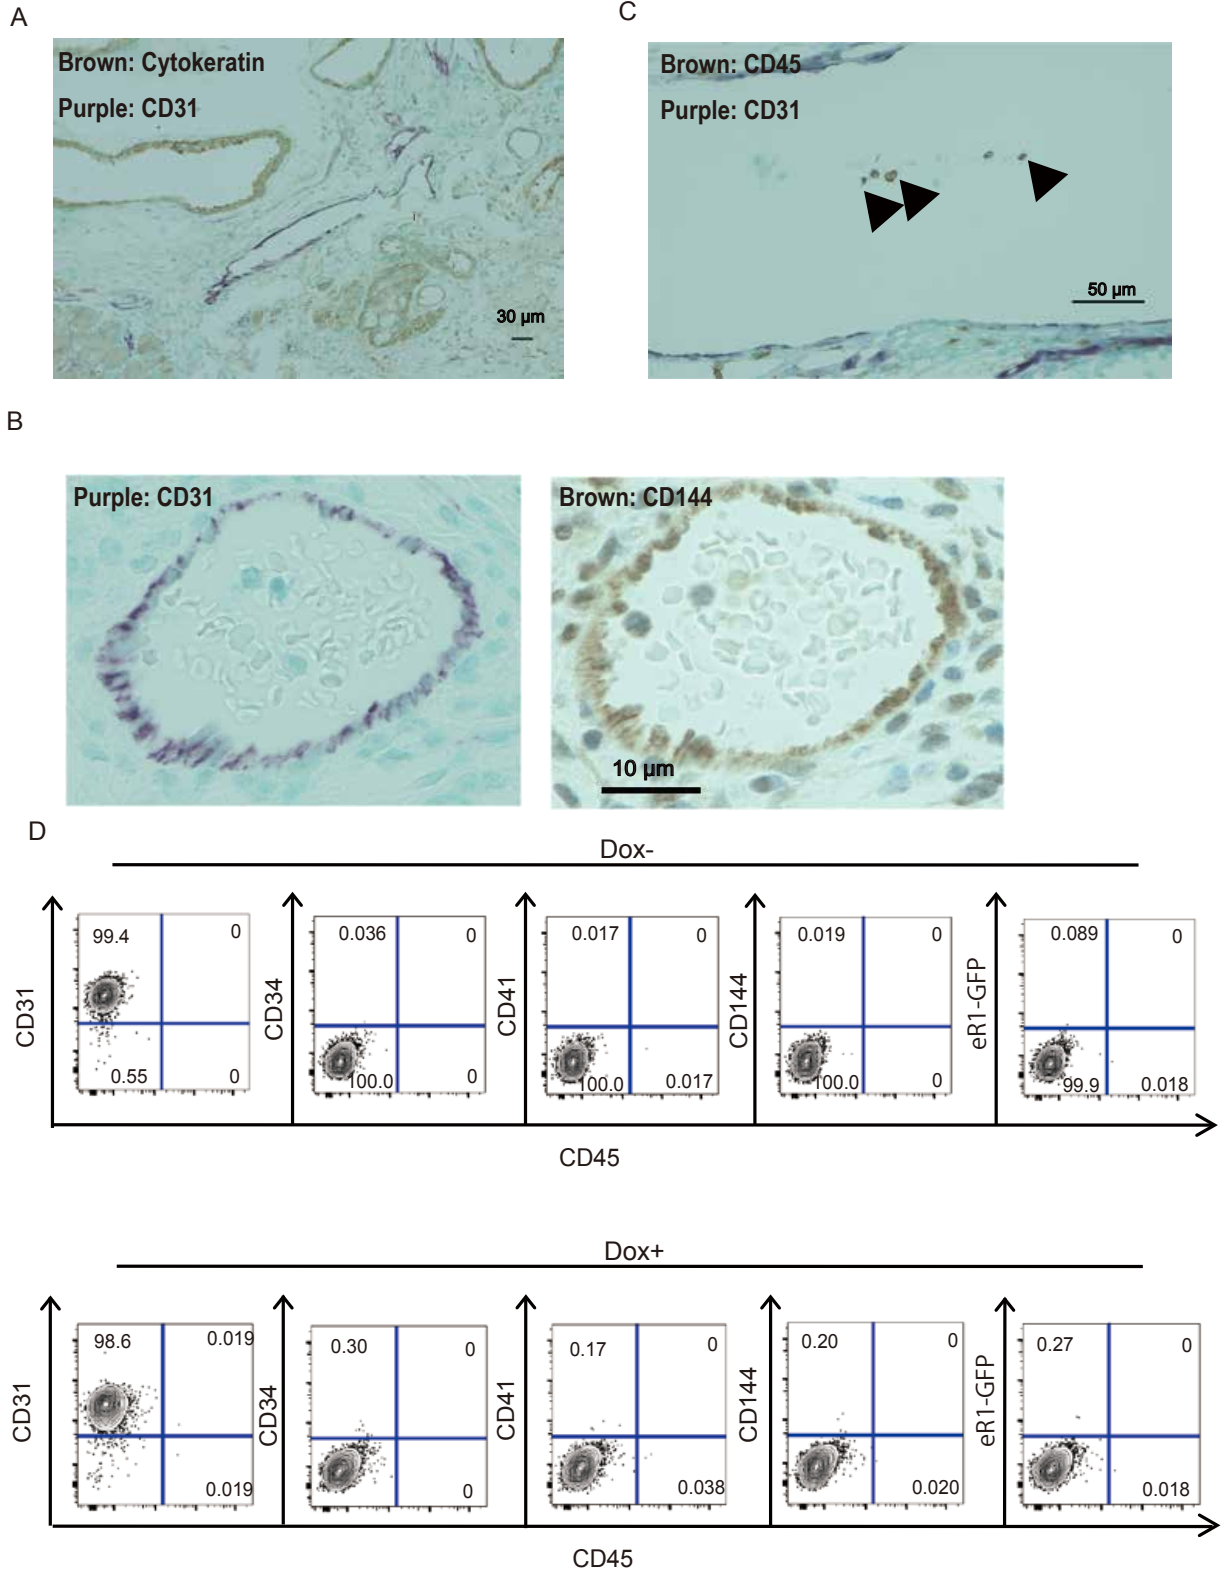

**Figure S2: Related to Figure 2; analysis of hematopoietic-generating tissue in teratomas**

(A) Representative image of a section of an GFG-teratoma immunostained for vascular

endothelial cells (CD31<sup>+</sup> cells; purple) and epithelial cells (Cytokeratin; brown).

(B) Serial sections of an GFP-teratoma immunostained for vascular endothelial cell markers CD31 (purple) and CD144 (brown).

(C) Representative image of a section of an GFP-teratoma immunostained for vascular endothelial cells (CD31<sup>+</sup> cells; purple) and hematopoietic cells (CD45<sup>+</sup> cells; brown).

(D) Representative flow cytometric plots displaying hematopoietic lineage marker expression on GFP-transduced eR1-iPSCs after four days cultured with or without dox.

Figure S3

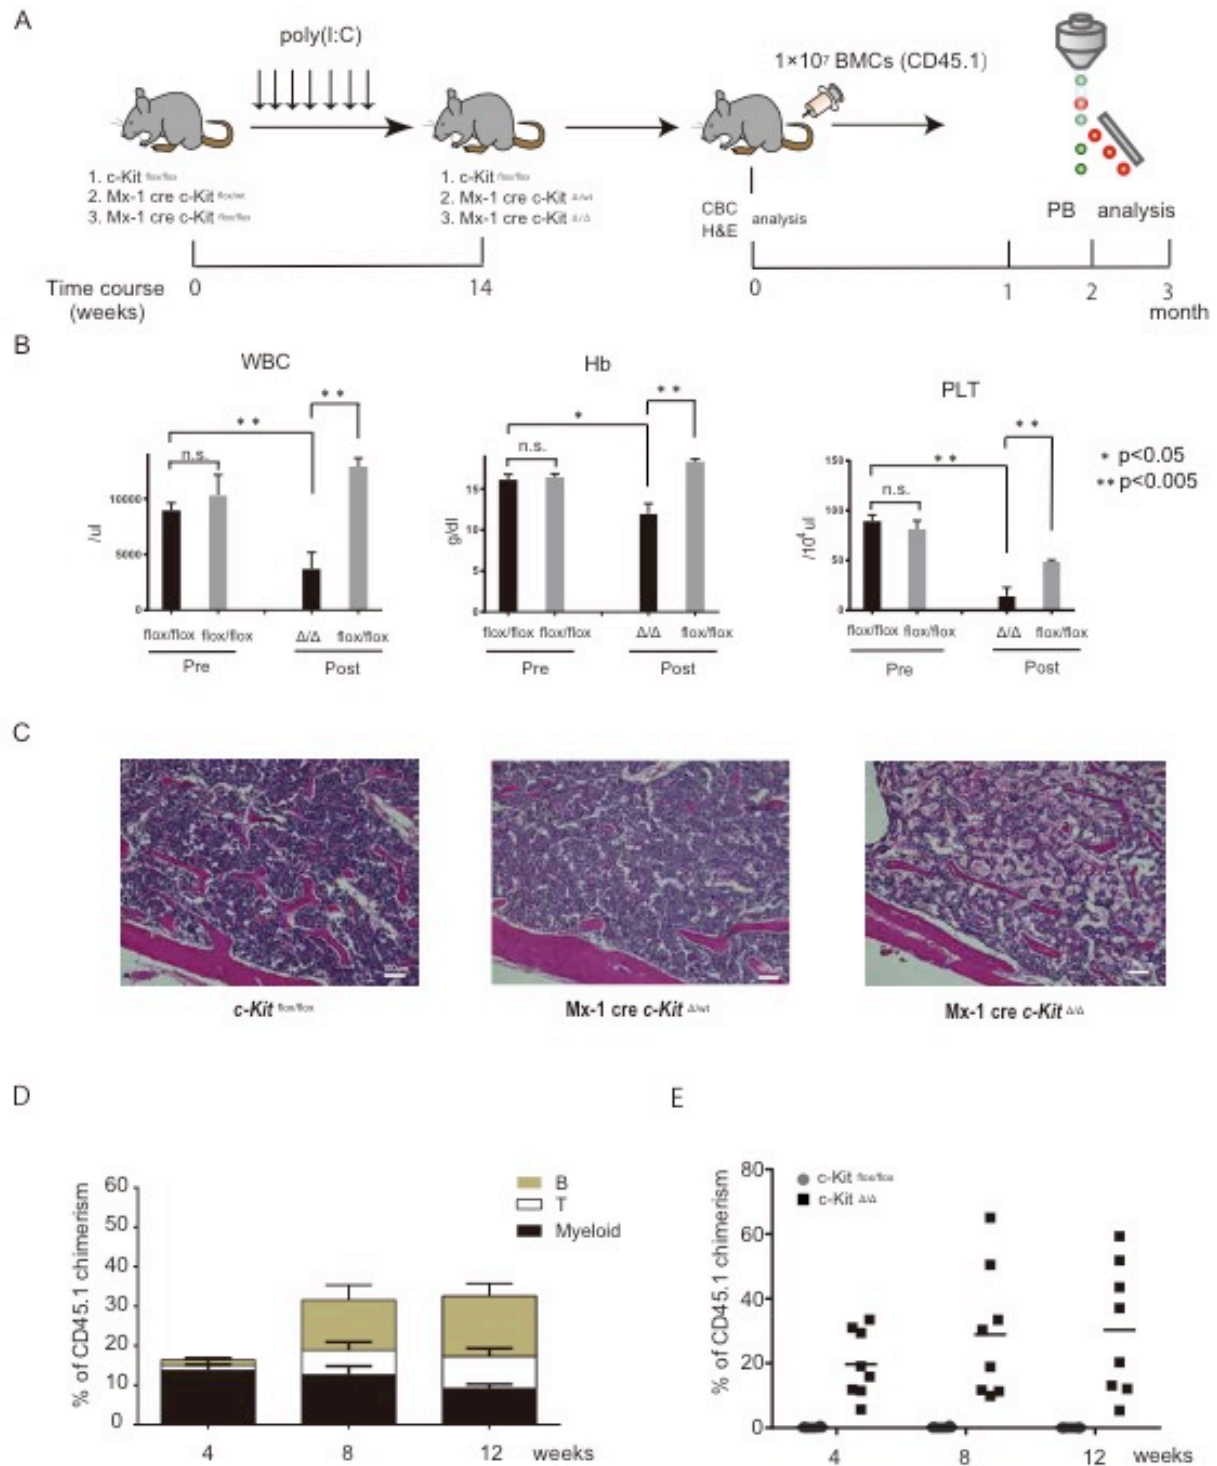

**Figure S3: Related to Figure 3; analysis of hematopoiesis in *c-Kit* deficient mice**

(A) Schematic of the strategy to validate HSPC-deficient host mice. CBC, histological analysis and hematopoietic reconstitution assay were undertaken following poly(I:C) administration.

(B) CBC was tested in peripheral blood (PB) from two groups of mice: poly(I:C)-treated (*c-Kit*-

deficient mice; black bars) and PBS-treated (control mice; grey bars). CBCs were tested both pre- and post-treatment. WBC: white blood cell, Hb: hemoglobin, PLT: platelet. Data are the mean  $\pm$  SD from two independent experiments (n = 6 per group). \*\* $P < 0.005$ , \* $P < 0.05$ , n.s : not significant.

(C) *c-Kit* deficiency leads to impaired hematopoiesis. Femurs section from the control and *c-Kit*-deficient mice stained with hematoxylin-eosin.

(D, E) Donor-derived PB cell ratio was measured 12 weeks after transplantation into poly (I:C administrated recipients together with  $1 \times 10^7$  bone marrow (BM) cells (CD45.1). (n=8)

Figure S4

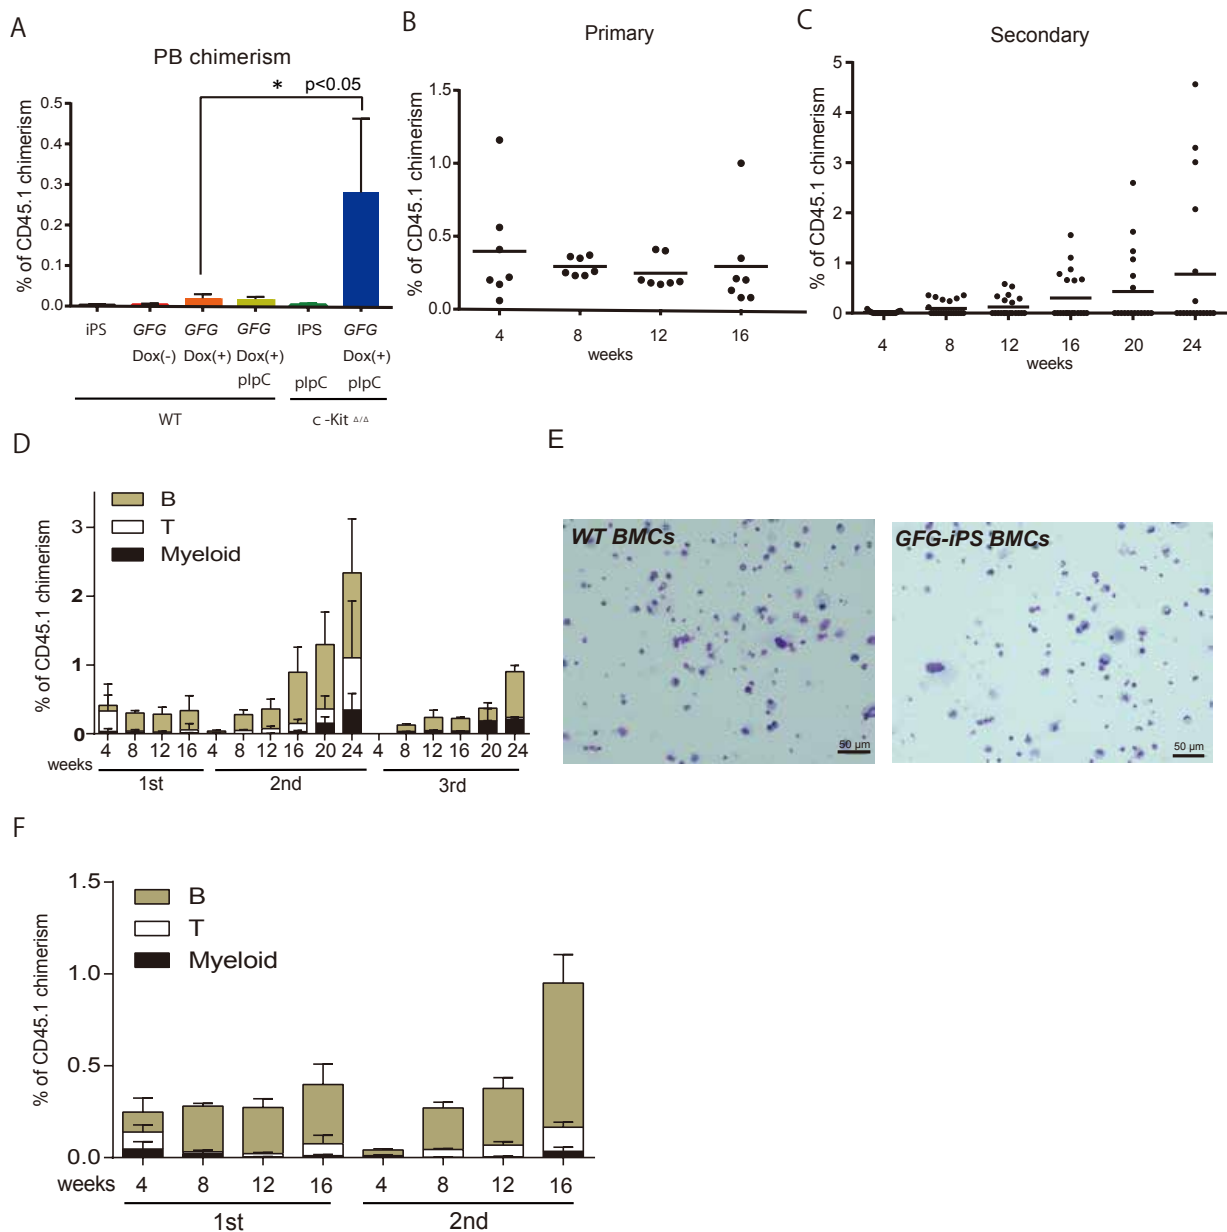

Figure S4: Related to Figure 3 and 4; *c-Kit* deficiency affords long-term HSC formation



**from *GFG*-teratomas**

(A) Percentage of CD45.1<sup>+</sup> PB chimerism in teratoma-bearing C57BL/6 mice and *c-Kit*-deficient mice at 14-16 weeks after iPSCs injection. Data are the mean  $\pm$  SD (n = 8 \**P* < 0.05).

(B,C) Percentage of CD45.1<sup>+</sup> PB chimerisms in primary (B) and secondary (C) recipients of the bone marrow transplantation assay described in Figure 3D. Data are the mean  $\pm$  SD from two independent experiments (n = 8 primary n=21 secondary)

(D) Percentage of CD45.1<sup>+</sup> PB chimerisms in primary, secondary, and tertiary recipients of BM from teratoma-bearing host mice. Data are the mean  $\pm$  SD from two independent experiments. (n=5)

(E) Cytospin images of CFUs from the colony-forming assay with *GFG*-iPSC derived BMCs from recipient mice after secondary transplantation (n=5).

(F) Percentage CD45.1<sup>+</sup> PB chimerism analysis of teratoma block-derived BM cells after transplanting into primary and secondary recipient mice. Data are the mean  $\pm$  SD from two independent experiments (n=5).

(E) Frequency teratomas giving rise to CD45.1<sup>+</sup> PB cells, from various origins (n=5).
